# Supplementary material for: The MFN1 and MFN2 mitofusins promote clustering between mitochondria and peroxisomes
Source: PubMed Central journal article supplement (PMC9076876; doi:10.1038/s42003-022-03377-x), 2022-05-06
Supplement: 42003_2022_3377_MOESM2_ESM.pdf [file 42003_2022_3377_MOESM2_ESM.pdf]

## Description of Additional Supplementary Files

**File name:** Supplementary Data 1

**Description:** Mass spec analysis and source data for Fig 1c-e.

**File name:** Supplementary Data 2

**Description:** The source data for Fig 4f, 5c, 5f, 6e, 7b, and 7d-f
